# Supplementary material for: The psychological impact of the COVID-19 crisis is higher among young Swiss men with a lower socioeconomic status: Evidence from a cohort study
Source: PubMed Central journal article supplement (PMC8320994; doi:10.1371/journal.pone.0255050), 2021-07-29
Supplement: pone.0255050.s001.pdf [file pone.0255050.s001.pdf]

S1 Table. **Unadjusted**<sup>a</sup> analysis from Table 4: Associations between the psychological impact of the COVID-19 crisis and socioeconomic status, highest level of education and working in contact with potentially infected people

|                                                                                | Psychological impact of the COVID-19 crisis                             |                                      |                                   |                                                                  |                          |                               |
|--------------------------------------------------------------------------------|-------------------------------------------------------------------------|--------------------------------------|-----------------------------------|------------------------------------------------------------------|--------------------------|-------------------------------|
|                                                                                | Psychological distress during COVID-19 without mentioning it as a cause |                                      |                                   | Psychological distress due to COVID-19, mentioning it as a cause |                          |                               |
|                                                                                | <i>Measured during COVID-19 and adjusted for pre-COVID-19 levels</i>    |                                      |                                   | <i>Measured during COVID-19 only</i>                             |                          |                               |
|                                                                                | Depression<br><i>b</i> [95%CI]                                          | Perceived stress<br><i>b</i> [95%CI] | Sleep Quality<br><i>b</i> [95%CI] | Psychological trauma<br><i>b</i> [95%CI]                         | Fear<br><i>b</i> [95%CI] | Isolation<br><i>b</i> [95%CI] |
| <b>Socioeconomic status</b>                                                    |                                                                         |                                      |                                   |                                                                  |                          |                               |
| <b>Relative financial status</b> (ref: average; n = 684)                       |                                                                         |                                      |                                   |                                                                  |                          |                               |
| below average (n = 737)                                                        | <b>0.17 [0.07, 0.26]</b>                                                | <b>0.21 [0.11, 0.30]</b>             | -0.03 [-0.13, 0.06]               | <b>0.19 [0.08, 0.29]</b>                                         | <b>0.26 [0.16, 0.37]</b> | <b>0.23 [0.12, 0.33]</b>      |
| above average (n = 924)                                                        | <b>0.11 [0.02, 0.20]</b>                                                | 0.01 [-0.08, 0.10]                   | 0.01 [-0.08, 0.10]                | -0.05 [-0.15, 0.06]                                              | -0.08 [-0.18, 0.02]      | 0.09 [-0.01, 0.19]            |
| <b>Difficulty paying usual bills</b> (ref: easy or very easy; n = 971)         |                                                                         |                                      |                                   |                                                                  |                          |                               |
| fairly easy (n = 762)                                                          | 0.00 [-0.09, 0.08]                                                      | 0.02 [-0.07, 0.10]                   | -0.05 [-0.14, 0.04]               | <b>0.12 [0.03, 0.22]</b>                                         | <b>0.15 [0.06, 0.25]</b> | 0.04 [-0.06, 0.13]            |
| rather difficult or difficult (n = 612)                                        | 0.02 [-0.08, 0.12]                                                      | <b>0.17 [0.08, 0.27]</b>             | <b>-0.11 [-0.20, -0.01]</b>       | <b>0.41 [0.31, 0.52]</b>                                         | <b>0.42 [0.32, 0.52]</b> | <b>0.23 [0.13, 0.34]</b>      |
| <b>Highest level of education</b> (ref: apprenticeship (12–13 years); n = 944) |                                                                         |                                      |                                   |                                                                  |                          |                               |
| compulsory schooling (9 years; n = 41)                                         | -0.06 [-0.34, 0.23]                                                     | 0.18 [-0.11, 0.47]                   | 0.02 [-0.27, 0.31]                | 0.20 [-0.12, 0.53]                                               | 0.29 [-0.03, 0.60]       | 0.03 [-0.29, 0.34]            |
| secondary school (12–13 years; n = 221)                                        | <b>0.24 [0.10, 0.37]</b>                                                | <b>0.16 [0.02, 0.29]</b>             | <b>-0.16 [-0.30, -0.03]</b>       | 0.15 [0.00, 0.29]                                                | 0.10 [-0.05, 0.24]       | <b>0.26 [0.11, 0.40]</b>      |
| bachelor's degree (15 years; n = 612)                                          | <b>0.15 [0.06, 0.24]</b>                                                | 0.00 [-0.09, 0.10]                   | -0.06 [-0.16, 0.03]               | -0.10 [-0.20, 0.00]                                              | 0.09 [-0.01, 0.19]       | <b>0.11 [0.01, 0.22]</b>      |
| master's degree (17 years; n = 527)                                            | <b>0.26 [0.17, 0.36]</b>                                                | <b>0.13 [0.03, 0.22]</b>             | -0.07 [-0.16, 0.03]               | -0.06 [-0.17, 0.05]                                              | -0.02 [-0.13, 0.09]      | <b>0.19 [0.08, 0.29]</b>      |
| <b>Working in contact with potentially infected people</b>                     |                                                                         |                                      |                                   |                                                                  |                          |                               |
| <b>Job in healthcare sector in contact with patients</b> (ref: no; n = 1963)   |                                                                         |                                      |                                   |                                                                  |                          |                               |
| yes (n = 107)                                                                  | -0.02 [-0.19, 0.15]                                                     | -0.08 [-0.25, 0.09]                  | -0.02 [-0.20, 0.15]               | -0.10 [-0.30, 0.09]                                              | -0.19 [-0.38, 0.00]      | 0.02 [-0.17, 0.21]            |
| <b>Other job in contact with people (e.g. restaurant)</b> (ref: no; n = 1534)  |                                                                         |                                      |                                   |                                                                  |                          |                               |
| yes (n = 538)                                                                  | <b>-0.12 [-0.21, -0.04]</b>                                             | -0.08 [-0.17, 0.00]                  | 0.03 [-0.06, 0.12]                | 0.06 [-0.04, 0.15]                                               | 0.04 [-0.05, 0.14]       | 0.00 [-0.10, 0.10]            |

Note: Outcomes were z-standardized, and *b* represents differences in standard deviations with respect to the reference group. 95%CI = 95% confidence interval of *b*. <sup>a</sup> In contrast to Table 4, this analysis was only adjusted for language and age, respectively baseline for consequences measured before and after COVID-19, but not for changes during the COVID-19 crisis (experience of COVID-19 symptoms, COVID-19 symptoms in entourage, changes in employment status, change in workload, call up to military or civil protection unit, percentage of work at home). Coefficients in bold are significant at the *p* < .05 level.
