# Supplementary material for: The psychological impact of the COVID-19 crisis is higher among young Swiss men with a lower socioeconomic status: Evidence from a cohort study
Source: PLoS One. 2021 Jul 29;16(7):e0255050. doi: 10.1371/journal.pone.0255050 (PMC8320994; doi:10.1371/journal.pone.0255050)
Supplement: S3 Table — Note: t-tests were used to test difference in continuous variables and multinomial regressions for categorical variables (with % indicators). Non-respondents did either not reply at all or only partially and were therefore excluded from the study. The relative bias was calculated by the following formula: value total ((n not included/n included in study)* (value not included/value included in study))/value total sample). (PDF) [file pone.0255050.s003.pdf]

S3 Table. Differences in the variables measured before COVID-19 in non-respondents and respondents in the COVID-19 wave

|                                                                                               | Not included in study | Included in study | t-value or OR (multinomial regression) | p-value | relative bias |
|-----------------------------------------------------------------------------------------------|-----------------------|-------------------|----------------------------------------|---------|---------------|
| n                                                                                             | 2062                  | 2345              |                                        |         |               |
| Age                                                                                           | 28.17                 | 28.21             | -0.97                                  | .330    | -0.1%         |
| <b>Linguistic region</b>                                                                      |                       |                   |                                        |         |               |
| French-speaking                                                                               | 53.4%                 | 58.0%             | 1.205                                  | .002    | -3.8%         |
| German-speaking                                                                               | 46.6%                 | 42.0%             | ref.                                   |         |               |
| <b>Highest level of education (International Standard Classification of Education; ISCED)</b> |                       |                   |                                        |         |               |
| compulsory schooling (ISCED 2; 9 years)                                                       | 2.3%                  | 1.7%              | 0.802                                  | .324    | 12.1%         |
| secondary school diploma (ISCED 34; 12–13 years)                                              | 11.6%                 | 9.4%              | 0.841                                  | .105    | 9.9%          |
| apprenticeship (ISCED 35; 12–13 years)                                                        | 41.8%                 | 40.3%             | ref.                                   |         |               |
| bachelor's degree (ISCED 6; 15 years)                                                         | 24.4%                 | 26.1%             | 0.184                                  | 1.109   | -3.1%         |
| master's degree (ISCED 7; 17 years)                                                           | 19.9%                 | 22.5%             | 1.173                                  | .055    | -5.7%         |
| <b>Relative financial status</b>                                                              |                       |                   |                                        |         |               |
| below average                                                                                 | 32.8%                 | 31.4%             | 0.968                                  | .670    | 2.0%          |
| average                                                                                       | 29.5%                 | 29.2%             | ref.                                   |         |               |
| above average                                                                                 | 37.7%                 | 39.4%             | 1.057                                  | .453    | -2.1%         |
| <b>Difficulty paying usual bills</b>                                                          |                       |                   |                                        |         |               |
| easy or very easy                                                                             | 35.5%                 | 41.4%             | ref.                                   |         |               |
| fairly easy                                                                                   | 32.2%                 | 32.5%             | 0.864                                  | .043    | -0.4%         |
| rather difficult or difficult                                                                 | 32.3%                 | 26.1%             | 0.691                                  | .000    | 10.1%         |
| <b>Mental health</b>                                                                          |                       |                   |                                        |         |               |
| Major depression score                                                                        | 9.54                  | 9.10              | 1.86                                   | .063    | 2.2%          |
| Perceived stress score                                                                        | 5.46                  | 4.89              | 6.51                                   | .000    | 5.2%          |
| Sleep quality                                                                                 | 2.98                  | 3.00              | -0.84                                  | .402    | -0.3%         |

Note: t-tests were used to test difference in continuous variables and multinomial regressions for categorical variables (with % indicators). Non-respondents did either not reply at all or only partially and were therefore excluded from the study. The relative bias was calculated by the following formula: value total ((n not included/n included in study)\* (value not included/value included in study))/value total sample).
